# Supplementary material
Source: PubMed Central journal article supplement (PMC10540521)
Supplement: NIHPP2023.06.15.545144v4-supplement-1.pdf [file NIHPP2023.06.15.545144v4-supplement-1.pdf]

862

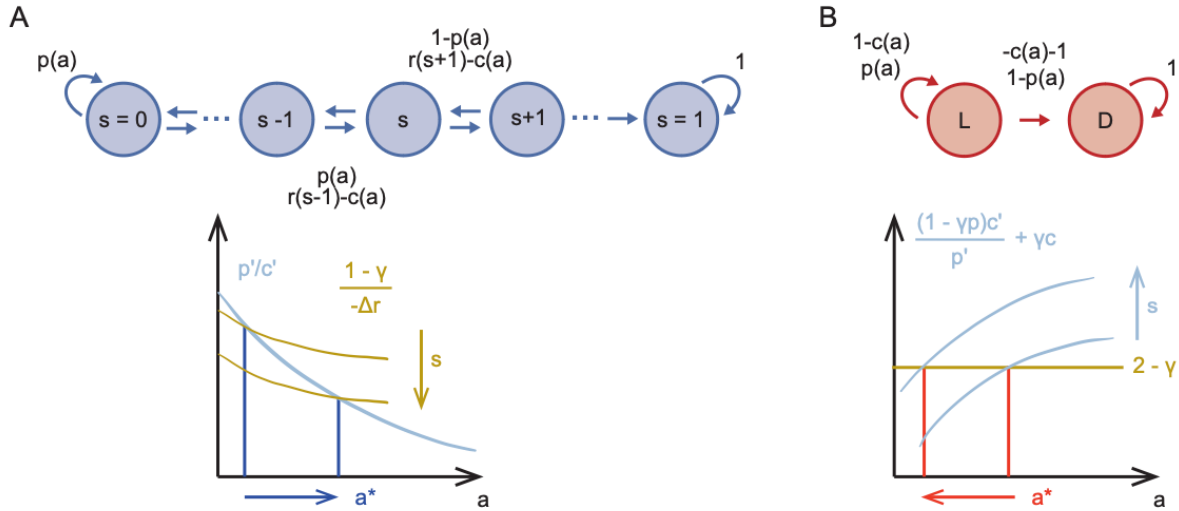

863

864

865

**Figure 2—figure supplement 1. Sketch of Markov Decision Processes model and predictions for stinging.**

866

867

868

869

870

871

872

873

874

875

876

877

878

879

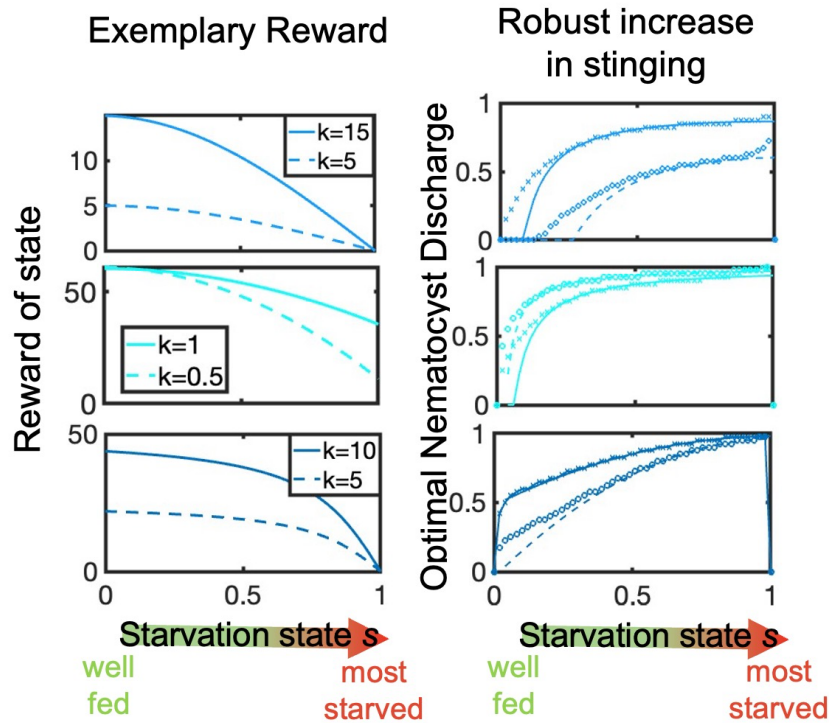

880

881

882

883

884

885

886

887

888

889

890

891

892

893

894

895

896

897

898

**Figure 2—figure supplement 2. Optimal policy predicted by Bellman’s theory for the MDP sketched in Figure 2—figure supplement 1A.**

*Left:* three choices of concave reward functions  $r(s)$ :  $r(s) = k \cos(s\pi/2)$ , upper left;  $r = k(1 - 50s^2) + 60$ , middle left;  $r = k \tan - 1(5(1 - s)/(\pi/10))$ , lower left. Solid and dashed lines correspond to two choices of the parameter  $k$  for each reward as in the legend. The cost of full discharge is constant  $c_0 = 1.5$  and the likelihood of successful discharge is  $p = p_M a(2 - a)$  with  $p_M = 0.6$ .

*Right:* the asymptotic solution for the optimal policy  $a^*(s)$  (solid and dashed lines matching the corresponding reward on the left) reproduces well the numerical solution obtained from solving Bellman’s Equation (1) with the value iteration algorithm (crosses and circles correspond to the solid and dashed rewards on the left). Optimal nematocyst discharge increases with the starvation state, independently on the shape of the reward function.

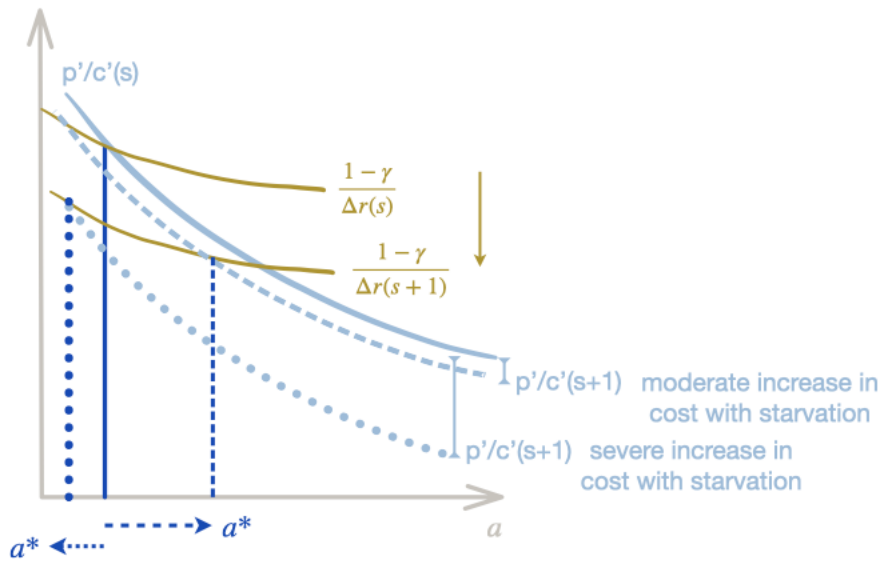

899

900

901

902

903

904

905

906

**Figure 2—figure supplement 3. Sketch of theoretical prediction for predatory stinging with increasing cost.** Similar to **Figure 2—figure supplement 1A bottom**, for the case where the cost per nematocyte varies with starvation  $c = c_0(s)a$ . Moderate increase in the cost per starvation (dashed light-blue line) do not affect the qualitative results as the green curve still intersects the light-blue curve for increasing values of  $a^*$  (marked by dashed dark-blue line). More dramatic increases of cost with starvation (light-blue dotted line) do lead to a decrease in predatory stinging with starvation as the intercept now moves backward with increasing  $s$  (marked by dark-blue dotted line).

907

908

909

910

911

912

913

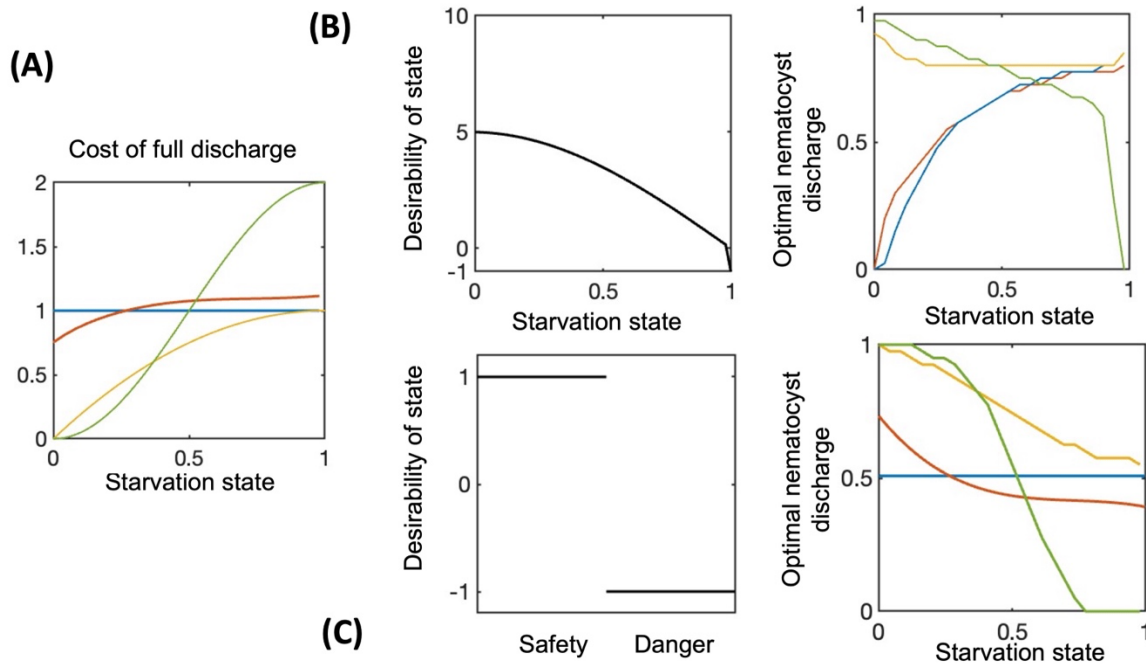

914  
915

**Figure 2—figure supplement 4. Effects of a moderately vs dramatically increasing cost with starvation.**

916 For a constant cost of full discharge or moderately increasing cost with starvation, predatory stinging always  
917 increases, whereas defensive stinging decreases or stays constant (results discussed in main text, **Figure 2**, and  
918 reproduced here for comparison, red and blue curves in Panels A-C. For predation, we use desirability 2 from **Figure**  
919 **2B**). When the cost function increases dramatically with starvation (panel A, yellow and green lines), defensive  
920 stinging keeps decreasing with starvation (panel C, right), but now also predatory stinging decreases with starvation  
921 (panel B, right, yellow and green lines). Results are obtained with numerical simulations.

922  
923  
924  
925  
926

927

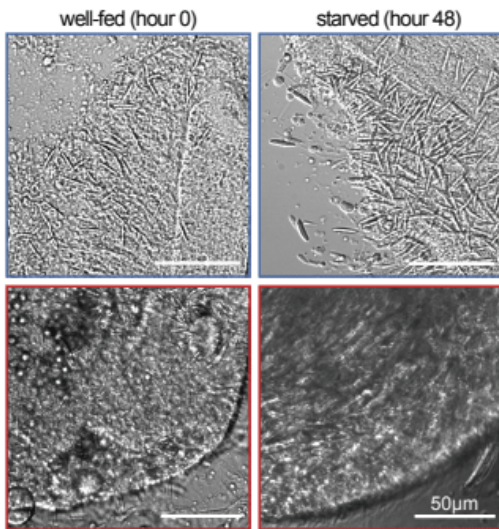

928

929

930

931

932

933

**Figure 2—figure supplement 5. Modulation of *Nematostella* and *Exaiptasia* stinging is not due to changes in the abundance of nematocytes.**

Nematocytes were highly abundant in tentacles from *Nematostella* (top) and *Exaiptasia* (bottom) before and after starvation. Representative of n = 3 animals. Scale bar = 50µm.

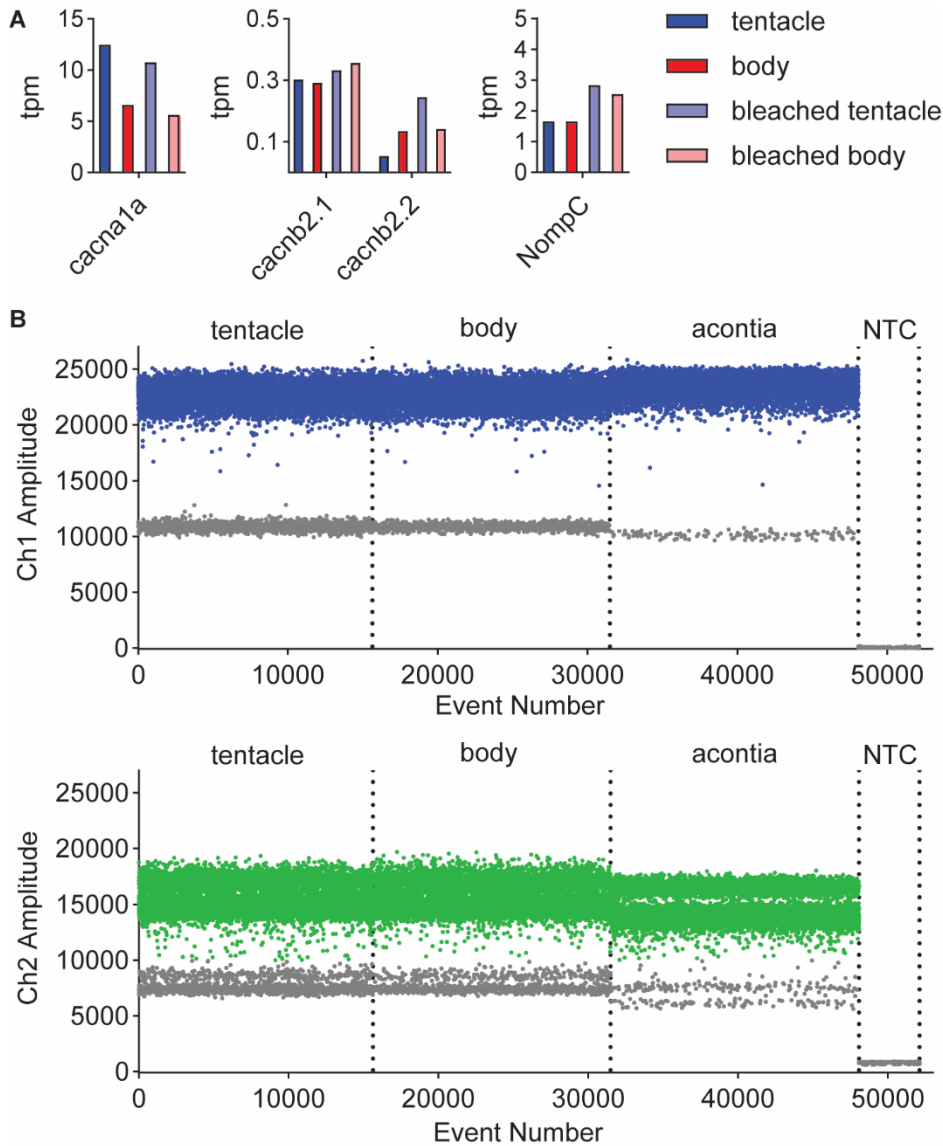

974  
975

976 **Figure 4—figure supplement 1. Transcriptomic and molecular analyses of *Exaiptasia*  $\beta$  subunit isoforms.**

977 **A)** mRNA expression (transcripts per million, TPM) of voltage-gated calcium ( $\text{Ca}_v$ ) channel  $\alpha$  and  $\beta$  subunits  
978 in *Exaiptasia* tentacle (nematocyte abundant, blue), body (nematocyte non-abundant, red), bleached (minimal  
979 symbionts) tentacle (light blue), bleached body (light red) tissues. The  $\text{Ca}_v$   $\alpha$  subunit was identified by  
980 homology to the sequence of the cnidarian  $\text{Ca}_v2.1$  homolog found enriched in *Nematostella* nematocyte-rich  
981 tissues (Weir et al., 2020). *NompC*, the putative mechanoreceptor in *Nematostella* nematocytes (Schüler et  
982 al., 2015; Weir et al., 2020), was also detected in *Exaiptasia* tentacles.

983 **B)** Representative plots of fluorescent amplitude across event number (droplet events) from amplification of  
984 unique regions of  $\text{EdCa}_v\beta1$  (Ch1, *Top*) and  $\text{EdCa}_v\beta2$  (Ch2, *Bottom*) sequences using droplet digital PCR  
985 (ddPCR, Bio-Rad Laboratories). Individual lanes correspond to tentacle RNA, body RNA, acontia RNA, and  
986 no template control (NTC). Blue and green points indicate positive PCR droplets after thresholding and gray  
987 points indicate negative droplets.  
988

1012

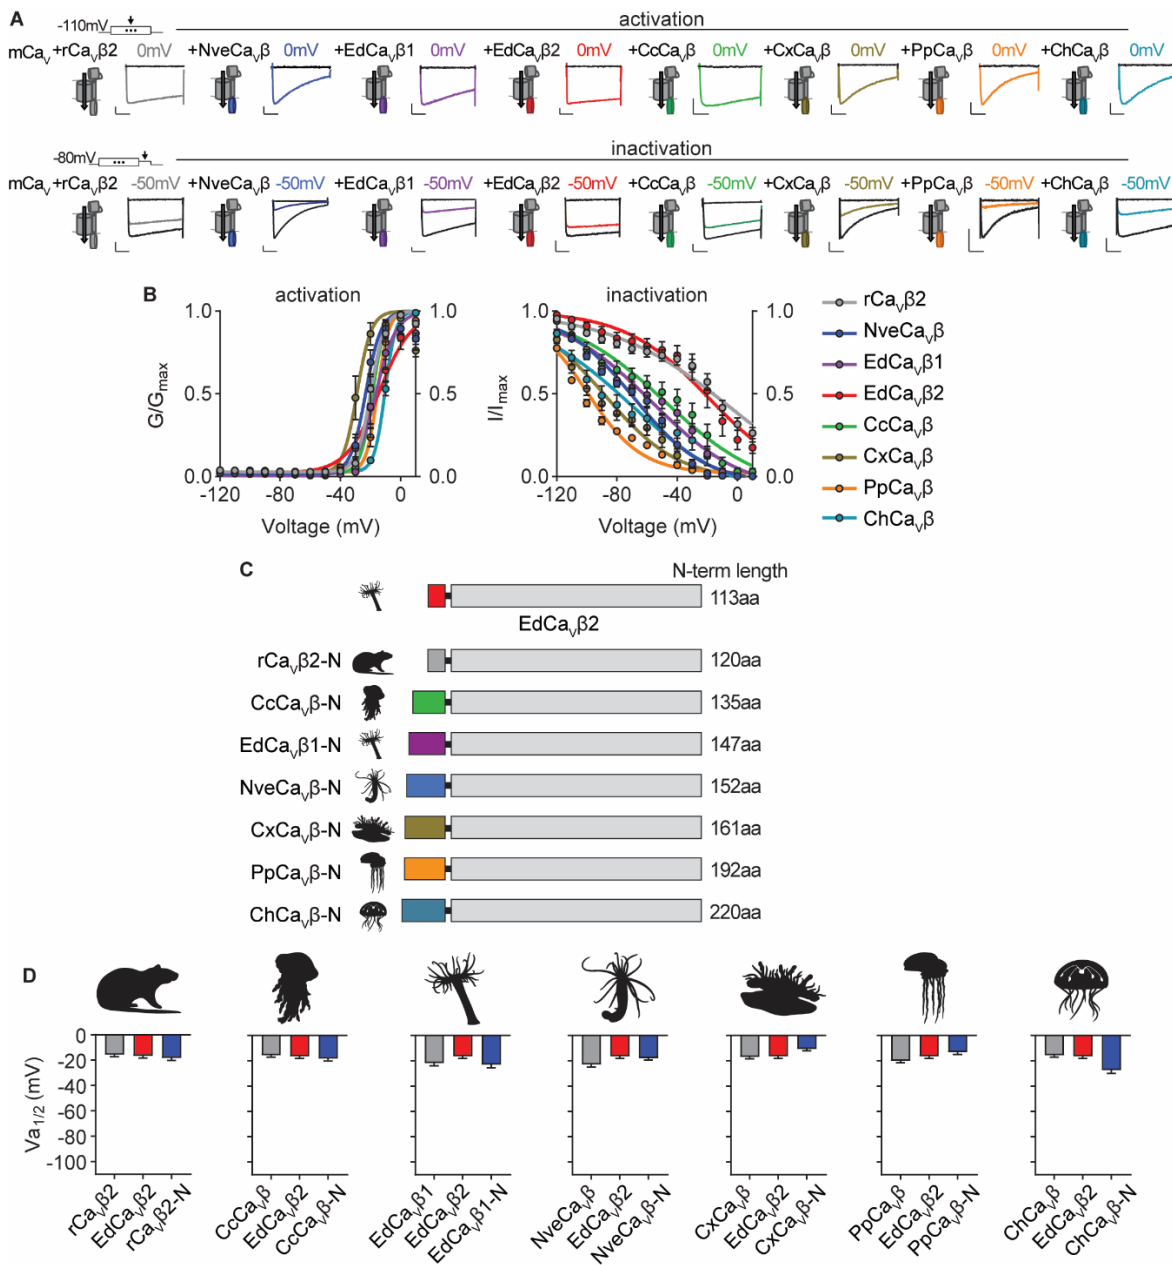

1013

1014

1015

1016

1017

1018

1019

1020

1021

1022

1023

1024

1025

1026

**Figure 5—figure supplement 1. Voltage-dependent activation of Cav channels is conserved across cnidarian β subunits.**

**A)** *Top:* Voltage-gated currents from heterologously-expressed chimeric Cav<sub>s</sub> with the indicated β subunits elicited by voltage pulses to -120mV (no current, black) and 0mV (colored). Abbreviations of species: Nve, *Nematostella vectensis*; Ed, *Exaiptasia diaphana*; Cc, *Cyanea capillata* (jellyfish); Pp, *Physalia physalis* (siphonophore); Ch, *Clytia hemisphaerica* (jellyfish); Cx, *Cassiopea xamachana* (jellyfish); r, *Rattus norvegicus*. *Bottom:* Voltage-gated currents elicited by a maximally activating voltage pulse following 1 s pre-pulses to -110 mV (max current, black), -50 mV (colored), or 20 mV (inactivated, no current, black). Scalebars = 100pA, 50ms.

**B)** Activation and inactivation curves for heterologously-expressed chimeric Cav<sub>s</sub> with different β subunits. Activation: rCavβ2 V<sub>a1/2</sub> = -19.76 ± 1.16mV, n = 12; NveCavβ V<sub>a1/2</sub> = -23.07 ± 1.16mV, n = 5; EdCavβ1 V<sub>a1/2</sub> = -18.27 ± 1.08mV, n = 8; EdCavβ2 V<sub>a1/2</sub> = -14.22 ± 1.46mV, n = 5; CcCavβ V<sub>a1/2</sub> = -18.47 ± 1.59mV,

1027 n = 6; CxCa<sub>v</sub>β V<sub>a1/2</sub> = -28.89 ± 1.54mV, n = 15; PpCa<sub>v</sub>β V<sub>a1/2</sub> = -15.29 ± 1.23mV, n = 10; ChCa<sub>v</sub>β V<sub>a1/2</sub> = -  
1028 10.30 ± 1.04mV, n = 12. rCa<sub>v</sub>β2 V<sub>i1/2</sub> = -2.98 ± 13.51mV, n = 12; NveCa<sub>v</sub>β V<sub>i1/2</sub> = -68.93 ± 1.53mV, n = 5;  
1029 EdCa<sub>v</sub>β1 V<sub>i1/2</sub> = -56.76 ± 3.18mV, n = 8; EdCa<sub>v</sub>β2 V<sub>i1/2</sub> = -18.84 ± 8.00mV, n = 5; CcCa<sub>v</sub>β subunit V<sub>i1/2</sub> = -  
1030 47.81 ± 5.57mV, n = 6; CxCa<sub>v</sub>β V<sub>i1/2</sub> = -87.75 ± 1.72mV, n = 15; PpCa<sub>v</sub>β V<sub>i1/2</sub> = -99.80 ± 0.92mV, n = 10;  
1031 ChCa<sub>v</sub>β V<sub>i1/2</sub> = -70.25 ± 4.67mV, n = 12 cells.  
1032 **C)** Diagram of Ca<sub>v</sub> β subunit domain swaps and the length of the N-terminus swapped in amino acids.  
1033 **D)** Cnidarian Ca<sub>v</sub> β N-termini do not greatly affect voltage-dependent activation of Ca<sub>v</sub> channels containing  
1034 EdCa<sub>v</sub>β2. Voltage-dependent activation (V<sub>a1/2</sub>) of heterologously-expressed Ca<sub>v</sub>s with WT EdCa<sub>v</sub>β2, β  
1035 subunits from the indicated cnidarians, and chimeras with their N-termini on EdCa<sub>v</sub>β2, p = 0.5830 for  
1036 average V<sub>i1/2</sub> values across mutant beta subunits, one-way ANOVA with Bartlett's test and post-hoc Tukey  
1037 test, n = 4-7 cells. Data represented as mean ± sem.



1038  
1039

**Figure 5—supplement table 1: Wild type and Chimeric Ca<sub>v</sub>β amino acid sequences.**

| Protein name                                                               | Amino Acid Sequence                                                                                                                                                                                                                                                                                                                                                                                                                                                                                                                                                                                                                              |
|----------------------------------------------------------------------------|--------------------------------------------------------------------------------------------------------------------------------------------------------------------------------------------------------------------------------------------------------------------------------------------------------------------------------------------------------------------------------------------------------------------------------------------------------------------------------------------------------------------------------------------------------------------------------------------------------------------------------------------------|
| <i>Exaiptasia diaphana</i><br>Ca <sub>v</sub> β1<br>(EdCa <sub>v</sub> β1) | MAQDFALSNRDIELDSLEHDSTGSSTPSEIQRWHMYSRSGRVVCKDSEPAYRASD<br>TSSVDEKETSRRRELERRAWEALQAARSKPVAFVRTNIAYEGSEDDDDSPVHGAA<br>VSFNVKDFLHVKEKFNDWWIGRVVKEGCDIGFIPTPSKLSLQVGPATGGRPV<br>RGSSKTVFHFNDMVNQAQSPNTSPSRHSSASVDAENGMEYNEEEQHSPTSPTSST<br>STLPRSASGNTVTSQSAPGQQGKSKAFFKKQEQLPPYDVVPSMRPIVLVGPLKGYE<br>VTDMMQKALFDYMKHQFSGRVLISRVTSDISLAKRSNLANPSKRNIERSNSKN<br>SGLAEVQQEIERIFELSRGLNLVVLDCDTVNHPQLAKTSLAPLVVYVKISAPKVLQ<br>RLIKTRGKTQSRALNVQLVAAEKLAQCSEDLIDLILDETQLQDACHHLGEFLESY<br>WRATHPPNQPSRPPNMQQSTPQYNVIEAGERPSVYL                                                                                                                        |
| <i>Exaiptasia diaphana</i><br>Ca <sub>v</sub> β2<br>(EdCa <sub>v</sub> β2) | MGNLDSVQSFTKDSEPAYRASDTSSVDEKETSRRRELERRAWEALQAARSKPVAF<br>AVRTNIAYEGSEDDDDSPVHGAAVSFNVKDFLHVKEKFNDWWIGRVVKEGCDIG<br>FIPTPSKLSLQVGPATGGRPVRGSSKTVFHFNDMVNQAQSPNTSPSRHSSASV<br>VDAENGMEYNEEEQHSPTSPTSSTLPRSASGNTVTSQSAPGQQGKSKAFFKKQ<br>EQLPPYDVVPSMRPIVLVGPLKGYEVTMMQKALFDYMKHQFSGRVLISRVTSDI<br>SLAKRSNLANPSKRNIERSNSKNSGLAEVQQEIERIFELSRGLNLVVLDCDTVNHP<br>QLAKTSLAPLVVYVKISAPKVLQRLIKTRGKTQSRALNVQLVAAEKLAQCSEDL<br>IDLILDETQLQDACHHLGEFLESYWRATHPPNQPSRPPNMQQSTPQYNVIEAGERP<br>SVYL                                                                                                                                                          |
| <i>Cyanea Capillata</i><br>Ca <sub>v</sub> β<br>(CcCa <sub>v</sub> β)      | MWFGTKKSKDSERRKRQPIDVYREQALSVPAYIWDGDDLSRKTSGTSSEYGEDD<br>IEQIRVQALEQLAAARVKPVAFAMRANYGYNGAEDDDSPIHGMALESFEPKDFLHI<br>KEKFNNNDWLIGRVVREGCDIGFIPSPSKLESRLSGLAGRKMRSSTSSNLHLQDAF<br>SASSPSEDRQNSFDDESLPSSPVKSVNPGVIGQPNSTAKKGIFKKNDSLPPYDVV<br>PSMRPVIFVGPLKGYEVTMMQKALFDYLVKHFQGRIVITRVADISTAKKSTIQ<br>NLAKKPIIKERGATQASQEVNQEIERIFELCRNLQLVVLDSYTVNYPQVAKTSLAP<br>IIVYIKISSPKVLRVLKSRGKSQSKNLNVQLVAAVKLGQCEMVDVVLDETQLE<br>DACEHLGEFLEAYWRAAHPSQSNFGAAGAPGSFTANGQPVVVNYNSMDPFSAQS<br>PTRHLRTAQV                                                                                                                                                  |
| <i>Physalia physalis</i> Ca <sub>v</sub> β<br>(PpCa <sub>v</sub> β)        | MVTASYNVPLDNTSATHSFNYPHAFLLTHSSCSYHSNEGFINSSTEVDIVDENDFKP<br>LFEGNSNEPHCQKKVISFSSLLDNVVAPIWYFFEMGDEFDSRKTSGTSSEYGEEDVE<br>ALRVQALEQLAAAASKPVAFVRANYGYNGSEDEDCPVNGMAVSFEAKDCLHIK<br>VKFNNDWWIGRVVKEGHDIGFIPASRLDNIRQSGISGKLLRQSSTSSNMNLEDQ<br>SQPLSREQDNRSPSEERGTSFDDDSPASPLRNPSGSSLTANNNNNSNTASNVNSQ<br>PKGKKGIFKSENLPYDVVPSMRPIIFVGPLKGYEVTNMMQKALFDYLVKHFQGR<br>RIVITRVGADISLAKRSFQHPGKQPVIQKKGNTQSGIVEVQQEIERIFELCRSMQLV<br>VLDCESINHPSQVAKTSLAPIAMIRIASPKVLRILKSRGKSQTKHLNFQLVAAEKL<br>NQCTEDMFDVILDENQLEDACEHLGDFLEAYWRSVPPRRPYVNSDNRSYNNAG<br>GQSIGNYNGGGQYNGTPQRHLRTAQV                                                                   |
| <i>Cassiopea xamachana</i><br>Ca <sub>v</sub> β<br>(CxCa <sub>v</sub> β)   | MVQKSGMSRGPYPSPQEIPEVDFPSPQKYSKRKGRFKRSDGSTSSDTSNSFVR<br>QGSAESYTSRPSDSVLEEDREALRKEAERQALAQLEKAKTKPVAFVRTNVGY<br>NPSPGDEVPVQGVAITFEPKDFLHIKEKYNNDDWWIGRLVKEGCEVGFIPSPVKLDS<br>LRLLEQTLRQNLSSSKSGDNSSSLGDVVTGTRRPTPPASAKQKQKSTEHVPPY<br>DVVPSMRPIILVGPLKGYEVTMMQKALFDYLVKHFQGRISITRVADISLAKRSV<br>LNNPSKHIIERSNTRSSLAEVQSEIERIFELARTLQLVALDADTINHPAQLSKTSLAPI<br>IVYIKITSPKVLQRLIKSRGKSQSKHLNVQIAASEKLAQCPPEMFDIILDENQLEDAC<br>EHLAEYLEAYWKATHPPSSTPPNPLNRTMATAALAASPAPVSNLQGPYLASGDQ<br>PLDRATGEHASVHEYPGELGQPPGLYPSNHPPGRAGTLRALSQRQDTFDADTPGSRN<br>SAYTEPGDSCVDMETDPSEGPGGDPAGGGTTPPARQGSWEEEDYEEEMTDNRNR<br>GRNKARYCAEGGGPVLGRNKNELEGWGQGVYIR |

|                                                                                |                                                                                                                                                                                                                                                                                                                                                                                                                                                                                                                                                                                                                                                                                                   |
|--------------------------------------------------------------------------------|---------------------------------------------------------------------------------------------------------------------------------------------------------------------------------------------------------------------------------------------------------------------------------------------------------------------------------------------------------------------------------------------------------------------------------------------------------------------------------------------------------------------------------------------------------------------------------------------------------------------------------------------------------------------------------------------------|
| <p><i>Clytia hemisphaerica</i><br/>Ca<sub>v</sub>β<br/>(ChCa<sub>v</sub>β)</p> | <p>MMHGSQTEPAISSMTSERNHKNLSHGSRSTSINSQRSTNKKVNSHVSFDESTAAPSS<br/>KKPGALSAAGGKKSVDNDFSSVLQTVFALRWQKKAQKKKKPDFFQQMYMHS<br/>MSGALGSIIGDEFDGRKTSSTSEYGDGEDLEALRILALEKLQAARTRPVAFVRA<br/>NYGYNGSEDDDSPVHGMAVSFEKDDCLHIKDKFNKDWWIGRVVKEGHNIGFVPS<br/>PDKLESIRQSGVSGKLMRQSSTSSNMNLHDDPQNQRSPLEAGGNSFDDET<br/>SPVRNVSTESNNTNNTNNTNLSNAQKGGKGFKNEQLHPYVYVPSMRPIIFVGP<br/>SLKGYEVTDMMQKALFDYKHFSEIRIFTRVNADISLAKRSNLNNQNRQPNFPKKS<br/>NQQAGLAEVQEEVNRIFELCRSSQLVVLDCDTINNPQVIKTSLAPIIVAIKIASPKVLT<br/>RLIKSRGKNQVKHLNIQMIADKLSQCNEEMFDVVDENQLEDACEHLGEFLEAY<br/>WRAAVPGAQEGELISQENGGFVNQGGPNGAGYNGVDQYGTQPNRLRTAQV</p>                                                                                      |
| <p><i>Nematostella vectensis</i><br/>cacnb2.1<br/>(NVE β)</p>                  | <p>MEPEPGLSEQDIELDSLEQVSTASSFHSDIQRHYNDGREASRFIADDNFNRSDPAY<br/>RASDTSSIEEDRETSRRELEERRAWDALQAARSKPVAFVVRTNLRVDGSEDDDSPVH<br/>GAAVSFEAKDFLHVKEKFNDDWWIGRVVKEGCDIGFIPTPSKLSLQIGGTASGR<br/>GMRNSKRDFVQFDMVNQAQSPNTSPSRHSSTSVDAENGVEYDDDDQSPSTPNK<br/>TLPRSASGTTVSSQPGTATGTQGKPKKGLFKKQEQQLPPYDVVPSMRPIVVLVGP<br/>SLKGYEVTDMMQKALLDFMKHRFSGRVLIARVTSDISLAKRTNMSNPGKQTIMERT<br/>KNKNTGLAEVQQEIERIFELARGLNLVVLDCETVNHPTQLAKTSLAPMIVYIKIAAP<br/>KVLQRLIKTRGKSQSRNLSIQLVAAEKLAQCSEDMYDLVLEETQLDDACEHLGEF<br/>LESYWRATHPPNQPSRPPNVQPSNSTPQYNVIEGGERPSVYL</p>                                                                                                                                              |
| <p>Rat cacnb2a<br/>(Rat β)</p>                                                 | <p>MQCCGLVHRRRVVRSYGSADSYTSRPSDSVLSLEEDREAVRREAERQAQAQLEK<br/>AKTKPVAFVVRTNVRYSAAQEDDVPVPGMAISFEAKDFLHVKEKFNDDWWIGRL<br/>VKEGCEIGFIPSPVKLENMRLQHEQRAKQKGFYSSKSGGNSSSSLGDIVPSSRKST<br/>PSSAIDIDATGLDAEENDIPANHRSPKPSANSVTSPHSKEKRMPPFFKTEHTPPYD<br/>VVPMSRPVVLVGPVSLKGYEVTDMMQKALFDLKHFEGRISITRVTADISLAKRSV<br/>LNNPSKHAIERSNTRSSLAEVQSEIERIFELARTLQLVVLADDTINHPAQLSKTSL<br/>APIIVYVKISSPKVLQRLIKSRGKSQAKHLNVQMVAADKLAQCPPQESFDVILDEN<br/>QLEDA CEHLADYLEAYWKATHPPSSNLPNLLSRTLATSTLPLSPTLASNSQGSQ<br/>GDQRTDRSAPRSASQAEIEPCLEPVKKSQHRSSSATHQNHRSGTGRGLSRQET<br/>FDSETQESRDSAYVEPKEDYSHEHVDRYVPHREHNHREESHSSNGHRHREPRH<br/>RTRDMGRDQDHNECSKQRSRHKSKDRYCDKEGEVISKRRSEAGEWNRDVYIRQ</p>                |
| <p>Rat β with<br/>NVE Hook</p>                                                 | <p>MQCCGLVHRRRVVRSYGSADSYTSRPSDSVLSLEEDREAVRREAERQAQAQLEK<br/>AKTKPVAFVVRTNVRYSAAQEDDVPVPGMAISFEAKDFLHVKEKFNDDWWIGRL<br/>VKEGCEIGFIPSPVSKLSLQIGGTASGRGMRNSKRDFVQFDMVNQAQSPNTSPS<br/>RHSSTSVDAENGVEYDDDDQSPSTPNKTLPRSASGTTVSSQPGTATGTQGKPKK<br/>GLFKKQEQQLPPYDVVPSMRPVVLVGPVSLKGYEVTDMMQKALFDLKHFEGRIS<br/>ITRVTADISLAKRSVLLNPSKHAIERSNTRSSLAEVQSEIERIFELARTLQLVVL<br/>ADDTINHPAQLSKTSLAPIIVYVKISSPKVLQRLIKSRGKSQAKHLNVQMVAADK<br/>LAQCPPQESFDVILDENQLEDACEHLADYLEAYWKATHPPSSNLPNLLSRTLAT<br/>STLPLSPTLASNSQGSQGDQRTDRSAPRSASQAEIEPCLEPVKKSQHRSSSATH<br/>QNHRSGTGRGLSRQETFDSETQESRDSAYVEPKEDYSHEHVDRYVPHREHNH<br/>REESHSSNGHRHREP RHRTRDMGRDQDHNECSKQRSRHKSKDRYCDKEGEV<br/>ISKRRSEAGEWNRDVYIRQ</p> |
| <p>NVE β with<br/>Rat Hook</p>                                                 | <p>MEPEPGLSEQDIELDSLEQVSTASSFHSDIQRHYNDGREASRFIADDNFNRSDPAY<br/>RASDTSSIEEDRETSRRELEERRAWDALQAARSKPVAFVVRTNLRVDGSEDDDSPV<br/>HGAAVSFEAKDFLHVKEKFNDDWWIGRVVKEGCDIGFIPTPVKLENMRLQHEQR<br/>AKQKGFYSSKSGGNSSSSLGDIVPSSRKSTPSSAIDIDATGLDAEENDIPANHR<br/>SPKPSANSVTSPHSKEKRMPPFFKTEHTPPYDVVPSMRPIVVLVGPVSLKGYE<br/>VTDMMQKALLDFMKHRFSGRVLIARVTSDISLAKRTNMSNPGKQTIMERTKNK<br/>NTGLAEVQQEIERIFELARGLNLVVLDCETVNHPTQLAKTSLAPMIVYIKIAAP<br/>KVLQRLIKTRGKSQSRNLSIQLVAAEKLAQCSEDMYDLVLEETQLDDACEHLGE<br/>FLESYWRATHPPNQPSRPPNVQPSNSTPQYNVIEGGERPSVYL</p>                                                                                                                                                      |
| <p>Rat β with<br/>NVE GK</p>                                                   | <p>MQCCGLVHRRRVVRSYGSADSYTSRPSDSVLSLEEDREAVRREAERQAQAQLEK<br/>AKTKPVAFVVRTNVRYSAAQEDDVPVPGMAISFEAKDFLHVKEKFNDDWWIGRL</p>                                                                                                                                                                                                                                                                                                                                                                                                                                                                                                                                                                          |

|                                      |                                                                                                                                                                                                                                                                                                                                                                                                                                                                                                                                                                                                                                                                                                             |
|--------------------------------------|-------------------------------------------------------------------------------------------------------------------------------------------------------------------------------------------------------------------------------------------------------------------------------------------------------------------------------------------------------------------------------------------------------------------------------------------------------------------------------------------------------------------------------------------------------------------------------------------------------------------------------------------------------------------------------------------------------------|
| domain                               | VKEGCEIGFIPSPVKLENMRLQHEQRAKQGKIFYSSKSGGNSSSSSLGDIVPSSRKSTP<br>PSSAIDIDATGLDAEENDIPANHRSPKPSANSVTSPhSKEKRMPPFFKTEHTPPYDV<br>VPSMRPIVLVGPSLKGYEVTDMMQKALLDFMKHRFSGRVLIARVTSDisLAKRTN<br>MSNPGKQTIMERTKNKNTGLAEVQQEIERIFELARGLNLVVLDCETVNHPTQLAKT<br>SLAPMIVYIKIAAPKVLQRLIKTRGKSQSRNLSIQLVAAEKLAQCSEDMYDLVLEET<br>QLDDACEHLGEFLESYWRATHPPNQPGSRPPNVQPSNSTPQYNVIEGGERPSVYL                                                                                                                                                                                                                                                                                                                                     |
| NVE $\beta$ with<br>Rat GK<br>domain | MEPEPGLSEQDIELDSLEQVSTASSFHSDIQRHYNDGREASRFIADDNFNRSDPAY<br>RASDTSSIEEDRETSRRELERRAWDALQAARSKPVAFVVRTNLRVDGSEDDDDSPV<br>HGAAVSFEAKDFLHVKEKFNDDWWIGRVVKEGCDIGFIPTPSKLSLQQIGGTASG<br>RGMNRNSKRDFVQFDMVNQAQSPNTSPSRHSSTSVDAENGVEYDDDQQSPTSPTN<br>KTLPRASGTTVSSQPGTATGTQGKPKKGLFKKQEQLPPYDVVPSMRPVVLVGPSL<br>KGYEVTDMMQKALFDLKHREGRISITRVTADISLAKRSVLNNPSKHAIERSNTR<br>SSLAEVQSEIERIFELARTLQLVVLADDTINHPAQLSKTSLAPIIVYVKISSPKVLQRL<br>IKSRGKSQAKHLNVQMVAADKLAQCPPQESFDVILDENQLEDACEHLADYLEAY<br>WKATHPPSSNLPNLLSRTLATSTLPLSPTLASNSQGSQGDQRTDRSAPRSASQAE<br>EPCLEPVKKSQHRSSATHQNHRSGTGRGLSRQETFDSETQESRDSAYVEPKEDYS<br>HEHVDRYVPHREHNHREESHSSNGHRHREPRHRTRDMGRDQDHNECSKQRSRHK<br>SKDRYCDKEGEVISKRRSEAGEWNRDVYIRQ |
| Rat 5' on<br>NVE $\beta$             | MQCCGLVHRRRVVRSYGSADSYTSRPSDSVLEEDREAVRREAERQAQAQLEK<br>AKTKPVAFVVRTNLRVDGSEDDDDSPVHGAAVSFEAKDFLHVKEKFNDDWWIGRV<br>VKEGCDIGFIPTPSKLSLQQIGGTASGRGMNRNSKRDFVQFDMVNQAQSPNTSPS<br>RHSSTSVDAENGVEYDDDQQSPTSPTNKTLPRASGTTVSSQPGTATGTQGKPKKG<br>LFFKQEQLPPYDVVPSMRPIVLVGPSLKGYEVTDMMQKALLDFMKHRFSGRVLI<br>RVTSDisLAKRTNMSNPGKQTIMERTKNKNTGLAEVQQEIERIFELARGLNLVVL<br>CETVNHPTQLAKTSLAPMIVYIKIAAPKVLQRLIKTRGKSQSRNLSIQLVAAEKLAQ<br>CSEDMYDLVLEETQLDDACEHLGEFLESYWRATHPPNQPGSRPPNVQPSNSTPQY<br>NVIEGGERPSVYL                                                                                                                                                                                                         |
| Rat 5' + SH3<br>on NVE $\beta$       | MQCCGLVHRRRVVRSYGSADSYTSRPSDSVLEEDREAVRREAERQAQAQLEK<br>AKTKPVAFVVRTNVRYSAQEDDVPVPGMAISFEAKDFLHVKEKFNDDWWIGRL<br>VKEGCEIGFIPSPSKLSLQQIGGTASGRGMNRNSKRDFVQFDMVNQAQSPNTSPS<br>RHSSTSVDAENGVEYDDDQQSPTSPTNKTLPRASGTTVSSQPGTATGTQGKPKKG<br>LFFKQEQLPPYDVVPSMRPIVLVGPSLKGYEVTDMMQKALLDFMKHRFSGRVLI<br>RVTSDisLAKRTNMSNPGKQTIMERTKNKNTGLAEVQQEIERIFELARGLNLVVL<br>CETVNHPTQLAKTSLAPMIVYIKIAAPKVLQRLIKTRGKSQSRNLSIQLVAAEKLAQ<br>CSEDMYDLVLEETQLDDACEHLGEFLESYWRATHPPNQPGSRPPNVQPSNSTPQY<br>NVIEGGERPSVYL                                                                                                                                                                                                           |
| NVE 5' +<br>SH3 on Rat $\beta$       | MEPEPGLSEQDIELDSLEQVSTASSFHSDIQRHYNDGREASRFIADDNFNRSDPAY<br>RASDTSSIEEDRETSRRELERRAWDALQAARSKPVAFVVRTNVRYSAQEDDVPV<br>PGMAISFEAKDFLHVKEKFNDDWWIGRLVKEGCEIGFIPSPVKLENMRLQHEQRA<br>KQGKIFYSSKSGGNSSSSSLGDIVPSSRKSTPPSSAIDIDATGLDAEENDIPANHRSPK<br>SANSVTSPhSKEKRMPPFFKTEHTPPYDVVPSMRPVVLVGPSLKGYEVTDMMQK<br>ALFDLKHREGRISITRVTADISLAKRSVLNNPSKHAIERSNTRSSLAEVQSEIERIF<br>ELARTLQLVVLADDTINHPAQLSKTSLAPIIVYVKISSPKVLQRLIKSRGKSQAKHL<br>NVQMVAADKLAQCPPQESFDVILDENQLEDACEHLADYLEAYWKATHPPSSNLP<br>NLLSRTLATSTLPLSPTLASNSQGSQGDQRTDRSAPRSASQAE<br>EPCLEPVKKSQHRSSATHQNHRSGTGRGLSRQETFDSETQESRDSAYVEPKEDYS<br>HEHVDRYVPHREHNHREESHSSNGHRHREPRHRTRDMGRDQDHNECSKQRSRHK<br>SKDRYCDKEGEVISKRRSEAGEWNRDVYIRQ           |
| NVE 5' on<br>Rat $\beta$             | MEPEPGLSEQDIELDSLEQVSTASSFHSDIQRHYNDGREASRFIADDNFNRSDPAY<br>RASDTSSIEEDRETSRRELERRAWDALQAARSKPVAFVVRTNLRVDGSEDDDDSPVH<br>GAAVSFEAKDFLHVKEKFNDDWWIGRVVKEGCDIGFIPTPVKLENMRLQHEQRAK<br>QGKIFYSSKSGGNSSSSSLGDIVPSSRKSTPPSSAIDIDATGLDAEENDIPANHRSPKPSA                                                                                                                                                                                                                                                                                                                                                                                                                                                           |

|                                          |                                                                                                                                                                                                                                                                                                                                                                                                                                                                                                                                                            |
|------------------------------------------|------------------------------------------------------------------------------------------------------------------------------------------------------------------------------------------------------------------------------------------------------------------------------------------------------------------------------------------------------------------------------------------------------------------------------------------------------------------------------------------------------------------------------------------------------------|
|                                          | <p>NSVTSPPHSKEKRMPPFFKKTEHTPPYDVVPSMRPVVLVGPSTLKGYEVTMMQKALFDFLKHFRF</p> <p>EGRISITRVADISLAKRSVLNPNPSKHAIERSNTRSSLAEVQSEIERIFELARTLQLVVLADDTINHPAQLSKTSLAPIIVYVKISSPKVLQRLIKSRGKSQAKHLNVQMVAADKLAQCPPQESFDVILDENQLEDACEHLADYLEAYWKATHPPSSNLPNPLLSRTLATS TLPLSPTLASNSQGSQGDQRTDRSAPRSASQAEIEPCLEPVKKSQHRSSSATHQNH RSGTGRGLSRQETFDSETQESRDSA YVEPKEDYSHEHVDRYVPHREHNHREESHSSNGHRHREPRHRTRDMGRDQDHNECSKQRSRHKSKDRYCDKEGEVISKRRSEAGEWNRDVYIRQ</p>                                                                                                              |
| EdCav $\beta$ 2 with NVE $\beta$ NTerm   | <p>MEPEPGLSEQDIELDSLEQVSTASSFHSDIQRHYNDGREASRFIADDNFNRSDPAYRASDTSSIEEDRETSRRELERRAWDALQAARSKPVAFVRTNLR YDGEDDDSPVHGAAVSFEAKDFLHVKEKFNDDWWIGRVVKEGCDIGFIPTPSKLSLQQVGPATG GRPVRGSSKTVFHFNDMVNQAQSPNTSPSRHSSASVVDAENGMEYNEEQHSPTSPTSSTLPRASGNTVTSQSAPGQQGKSKKAFFKKQEQLPPYDVVPSMRPIVLV GPSLKGYEVTMMQKALFDYMKHQFSGRVLISRVTSDISLAKRSNLANPSKRNIERSNSKNSGLAEVQQEIERIFELSRGLNLVVLDCDTVNHPTQLAKTSLAPLVVYVKISAPKVLQRLIKTRGKTQSRALNVQLVAAEKLAQCSEDL YDLILDETQLQDACHHLG EFLESYWRATHPPNQPGSRPPNMQQSTPQYNVIEAGERPSVYL</p>                                                 |
| EdCav $\beta$ 2 with CcCav $\beta$ NTerm | <p>MWFGTKKSKDSERRKRQPIDVYREQALS VNPAIYWGDDLDRKTSSTSEYGEDDIEQIRVQALEQLAAARVKPVAFAMRANYGYNGAEDDDSPIHGMALSFEPKDFLHI KEKFNNDWLIGRVVREGCDIGFIPSPSKLSLQQVGPATGGRPVRGSSKTVFHFND MVNQAQSPNTSPSRHSSASVVDAENGMEYNEEQHSPTSPTSSTLPRASGNT VTSQSAPGQQGKSKKAFFKKQEQLPPYDVVPSMRPIVLVGPSTLKGYEVTMMQK ALFDYMKHQFSGRVLISRVTSDISLAKRSNLANPSKRNIERSNSKNSGLAEVQQEIERIFELSRGLNLVVLDCDTVNHPTQLAKTSLAPLVVYVKISAPKVLQRLIKTRGKT QSRALNVQLVAAEKLAQCSEDL YDLILDETQLQDACHHLG EFLESYWRATHPPNQ PGRPPNMQQSTPQYNVIEAGERPSVYL</p>                                                             |
| EdCav $\beta$ 2 with PpCav $\beta$ NTerm | <p>MVTASYNVPLDNTSATHSFNYPHAFLLTHSSCSYHSNEGFINSSTEVDIVDENDFKP LFEGNSNEPHCQKKVISFSSLLDNVVAPIWYFFEMGDEFDSRKTSGTSSEYGEEDV EALRVQALEQLAAAASKPVAFAVRANYGYNGSEDEDCPVNGMAVSFEAKDCLHI KVKFNNDWWIGRVVKEGHDIGFIPSPSKLSLQQVGPATGGRPVRGSSKTVFHFND DMVNQAQSPNTSPSRHSSASVVDAENGMEYNEEQHSPTSPTSSTLPRASGN TVTSQSAPGQQGKSKKAFFKKQEQLPPYDVVPSMRPIVLVGPSTLKGYEVTMMQKALFDYMKHQFSGRVLISRVTSDISLAKRSNLANPSKRNIERSNSKNSGLAEVQQEIERIFELSRGLNLVVLDCDTVNHPTQLAKTSLAPLVVYVKISAPKVLQRLIKTRGKT QSRALNVQLVAAEKLAQCSEDL YDLILDETQLQDACHHLG EFLESYWRATHPPNQ PGRPPNMQQSTPQYNVIEAGERPSVYL</p> |
| EdCav $\beta$ 2 with Rat $\beta$ NTerm   | <p>MQCCGLVHRRRVVRSYGSADSYTSRPSDSVSLIEDREAVRREAERQAQAQLEK AKTKPVAFVRTNVRYSAAQEDDVPVPGMAISFEAKDFLHVKEKFNNDWWIGRL VKEGCEIGFIPSPSKLSLQQVGPATGGRPVRGSSKTVFHFNDMVNQAQSPNTSP SRHSSASVVDAENGMEYNEEQHSPTSPTSSTLPRASGNTVTSQSAPGQQGKS KKAFFKKQEQLPPYDVVPSMRPIVLVGPSTLKGYEVTMMQKALFDYMKHQFSGR VLISRVTSDISLAKRSNLANPSKRNIERSNSKNSGLAEVQQEIERIFELSRGLNLVVLDCDTVNHPTQLAKTSLAPLVVYVKISAPKVLQRLIKTRGKTQSRALNVQLVAAEK LAQCSEDL YDLILDETQLQDACHHLG EFLESYWRATHPPNQ PGRPPNMQQSTPQ YNVIEAGERPSVYL</p>                                                                           |
| EdCav $\beta$ 2 with CxCav $\beta$ NTerm | <p>MVQKSGMSRGPYPPSQEIPMEVFDPSPOGKYSKRKGRFKRSDGSTSSDTSNSFVR QGSAESYTSRPSDSVSLIEDREALRKEAERQALAQLEKAKTKPVAFVRTNVGY NPSGDEVVQGVAITFEPKDFLHIKEKYNNDDWWIGRLVKEGCEVGFIPSPSKLSL LQQVGPATGGRPVRGSSKTVFHFNDMVNQAQSPNTSPSRHSSASVVDAENGME YNEEQHSPTSPTSSTLPRASGNTVTSQSAPGQQGKSKKAFFKKQEQLPPYDV VPSMRPIVLVGPSTLKGYEVTMMQKALFDYMKHQFSGRVLISRVTSDISLAKRSN LANPSKRNIERSNSKNSGLAEVQQEIERIFELSRGLNLVVLDCDTVNHPTQLAKTS</p>                                                                                                                                                   |

|                                                  |                                                                                                                                                                                                                                                                                                                                                                                                                                                                                                                                                                                                               |
|--------------------------------------------------|---------------------------------------------------------------------------------------------------------------------------------------------------------------------------------------------------------------------------------------------------------------------------------------------------------------------------------------------------------------------------------------------------------------------------------------------------------------------------------------------------------------------------------------------------------------------------------------------------------------|
|                                                  | LAPLVVYVKISAPKVLQRLIKTRGKTQSRALNVQLVAAEKLAQCSEDLYDLILDET<br>QLQDACHHLGEFLESYWRATHPPNQPSRPPNMQQSTPQYNVIEAGERPSVYL                                                                                                                                                                                                                                                                                                                                                                                                                                                                                              |
| EdCav $\beta$ 2 with<br>ChCav $\beta$<br>NTerm   | MMHGSQTEPAISSMTSERNHKNLSHGSRSTSINSQRSTNKKVNSHVSFDESTAAPSS<br>KKPGALSAAGGKKSVDNDFSSSVLQTVFALRWQKKAQKKKPPDDFQQMYMHS<br>MSGALGSIIGDEFDGRKTSSTSEYGDGEDLEALRILALEKLQAARTRPVAFVRA<br>NYGYNGSEDDDSPVHGMAVSFEKDDCLHIKDKFNKDWIGR VVKEGHNIGFVPS<br>PSKLKSLQQVGPATGGRPVRGSSKTVFHFNDMVNQAQSPTNTSPSRHSSASV VDA<br>ENGMENEEEQHSPTSPTSSTLPRSASGNTVTSQSAPGQQGKSKKAFFKKQEQL<br>PPYDVVPSMRPIVLVGPSLKGYEVTMMQKALFDYMKHQFSGRVLISRVTSDISL<br>AKRSNLANPSKRNIERSNSKNSGLAEVQQEIERIFELSRGLNLVVLDCDTVNHPTQ<br>LAKTSLAPLVVYVKISAPKVLQRLIKTRGKTQSRALNVQLVAAEKLAQCSEDLYD<br>LILDETQLQDACHHLGEFLESYWRATHPPNQPSRPPNMQQSTPQYNVIEAGERPS<br>VYL |
| EdCav $\beta$ 2 with<br>EdCav $\beta$ 1<br>NTerm | MAQDFALSNRDIELDSLEHVSTGSSTPSEIQRWHMYSRGRVVKDSEPAYRAS<br>DTSSVDEKETSRRRELERRAWEALQAARSKPVAFVVRTNIA YEGSEDDDSPVHGA<br>AVSFNVKDFLHVKEKFNDWWIGR VVKEGCDIGFIPTPSKLKSLQQVGPATGGRP<br>VRGSSKTVFHFNDMVNQAQSPTNTSPSRHSSASV VDAENGMENEEEQHSPTSPT<br>SSTLPRSASGNTVTSQSAPGQQGKSKKAFFKKQEQLPPYDVVPSMRPIVLVGPS<br>LKGYEVTMMQKALFDYMKHQFSGRVLISRVTSDISLAKRSNLANPSKRNIERSN<br>SKNSGLAEVQQEIERIFELSRGLNLVVLDCDTVNHPTQLAKTSLAPLVVYVKISAP<br>KVLQRLIKTRGKTQSRALNVQLVAAEKLAQCSEDLYDLILDETQLQDACHHLGEF<br>LESYWRATHPPNQPSRPPNMQQSTPQYNVIEAGERPSVYL                                                                                 |

1040  
1041
